# Supplementary material for: Functional Characteristics, Electrophysiological and Antennal Immunolocalization of General Odorant-Binding Protein 2 in Tea Geometrid, Ectropis obliqua
Source: PubMed Central journal article supplement (PMC5877736; doi:10.3390/ijms19030875), 2018-03-15
Supplement: ijms-19-00875-s001.pdf [file ijms-19-00875-s001.pdf]

**Table S1.** Chemical ligands

| Name                | Purity (%) | Name                     | Purity (%) |
|---------------------|------------|--------------------------|------------|
| Cis-3-hexen-1-ol    | >98        | Dibutyl phthalate        | >99        |
| 1-pentanol          | >99.5      | Triethyl phosphate       | >99        |
| Benzyl alcohol      | >99.5      | Methyl salicylate        | >98        |
| Hexanol             | >98        | ( <i>E</i> )-2-pentenal  | >95        |
| 1-pentene-3-ol      | >98        | ( <i>E</i> )-2-hexenal   | >95        |
| $\alpha$ -terpineol | >97        | ( <i>E</i> )-2-decenal   | >95        |
| Linalool            | >98        | Benzaldehyde             | >98        |
| Nerol               | >98        | $\beta$ -ionone          | >96        |
| Hexadecanoic acid   | >97        | Acetophenone             | >98.5      |
| 1,3-dioxolane       | >99        | N-phenyl-1-naphthylamine | >98        |
